# Supplementary material
Source: PubMed Central journal article supplement (PMC3428712)

Supplementary Figure 1A

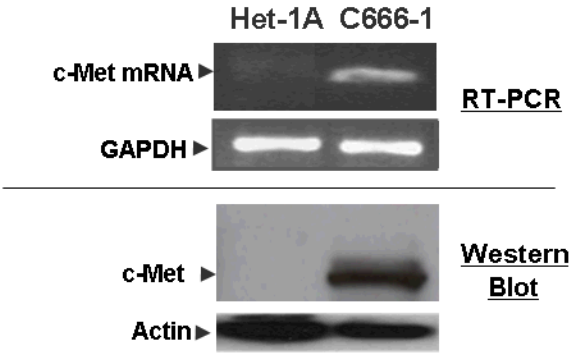

Supplementary Figure 1B

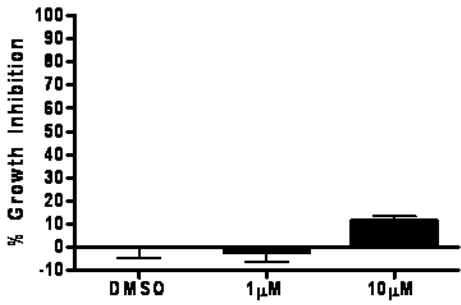

Supplementary Figure 1C

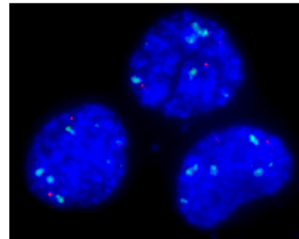

NCI-H1993  
c-Met/CEP 7 > 1.8  
(MET amplification)

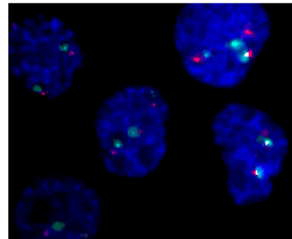

HK1-LMP1  
c-Met/CEP 7 = 1  
(no amplification)

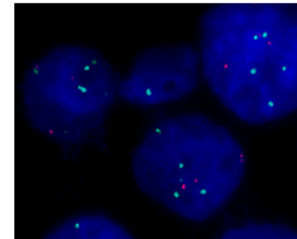

CNE-2  
c-Met/CEP 7 = 1  
(no amplification)

## Supplementary Figure 2A

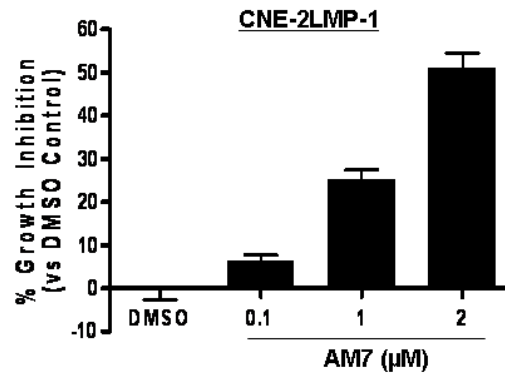

## Supplementary Figure 2B

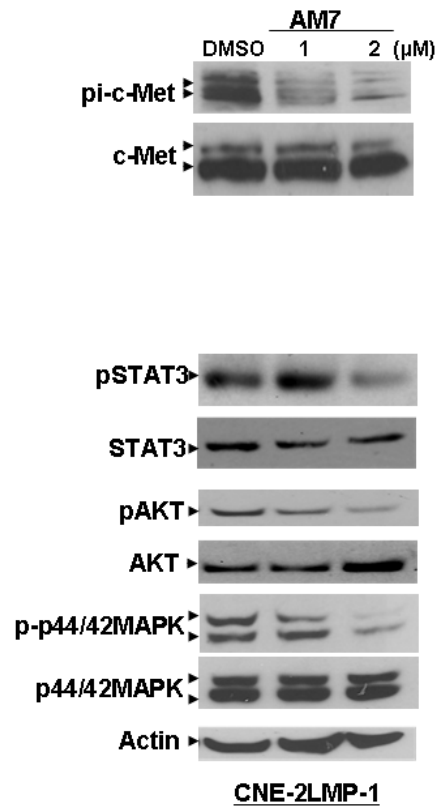

Supplementary Figure 3

HONE-1  
retrovirus-infected  
stable cell lines

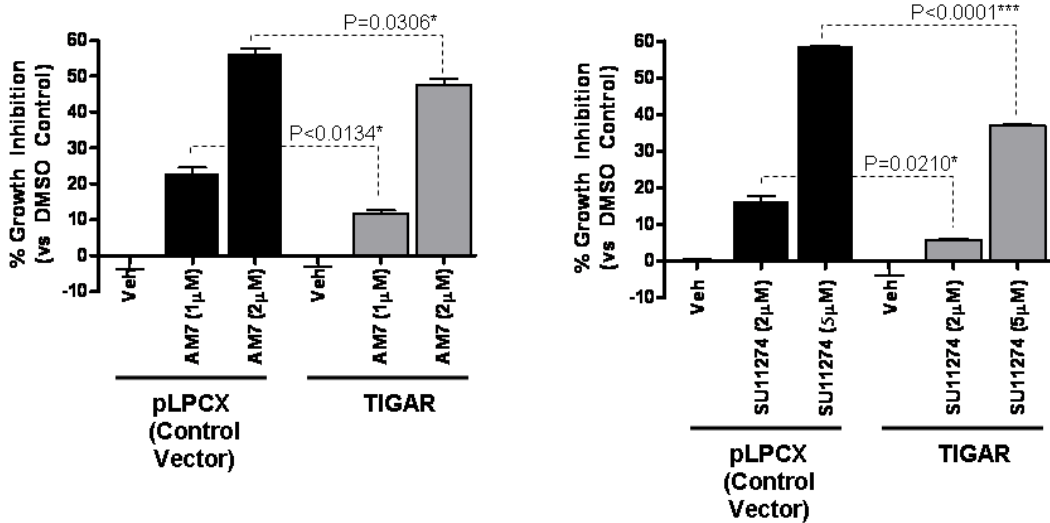

Supplement: NIHMS400238-supplement-supplement_1.pdf [file NIHMS400238-supplement-supplement_1.pdf]
